# Supplementary material for: Structural basis of indisulam-mediated RBM39 recruitment to DCAF15 E3 ligase complex
Source: Springer Nature journal article supplement (doi:10.1038/s41589-019-0411-6), 2019-12-09
Supplement: 41589_2019_411_MOESM53_ESM.mol [file 41589_2019_411_MOESM53_ESM.mol]

nchembio.A190809909A-comp27.mol
  ChemDraw10151910212D

 26 28  0  0  0  0  0  0  0  0999 V2000
   -1.0051    2.1792    0.0000 C   0  0  0  0  0  0  0  0  0  0  0  0
   -1.0051    1.3540    0.0000 C   0  0  0  0  0  0  0  0  0  0  0  0
   -0.2906    0.9415    0.0000 C   0  0  0  0  0  0  0  0  0  0  0  0
    0.4241    1.3540    0.0000 C   0  0  0  0  0  0  0  0  0  0  0  0
    0.4241    2.1792    0.0000 C   0  0  0  0  0  0  0  0  0  0  0  0
   -0.2906    2.5917    0.0000 C   0  0  0  0  0  0  0  0  0  0  0  0
    1.2091    1.0991    0.0000 N   0  0  0  0  0  0  0  0  0  0  0  0
    1.6938    1.7666    0.0000 C   0  0  0  0  0  0  0  0  0  0  0  0
    1.2091    2.4342    0.0000 C   0  0  0  0  0  0  0  0  0  0  0  0
   -0.2906    3.4140    0.0000 C   0  0  0  0  0  0  0  0  0  0  0  0
   -0.2906    0.1192    0.0000 N   0  0  0  0  0  0  0  0  0  0  0  0
   -1.0028   -0.2916    0.0000 S   0  0  0  0  0  0  0  0  0  0  0  0
   -1.7145    0.1192    0.0000 O   0  0  0  0  0  0  0  0  0  0  0  0
   -1.0028   -1.1140    0.0000 C   0  0  0  0  0  0  0  0  0  0  0  0
   -1.0028    0.5306    0.0000 O   0  0  0  0  0  0  0  0  0  0  0  0
   -1.7173   -1.5266    0.0000 C   0  0  0  0  0  0  0  0  0  0  0  0
   -1.7173   -2.3517    0.0000 C   0  0  0  0  0  0  0  0  0  0  0  0
   -1.0028   -2.7643    0.0000 C   0  0  0  0  0  0  0  0  0  0  0  0
   -0.2882   -2.3517    0.0000 C   0  0  0  0  0  0  0  0  0  0  0  0
   -0.2882   -1.5266    0.0000 C   0  0  0  0  0  0  0  0  0  0  0  0
   -1.0028   -3.5865    0.0000 C   0  0  0  0  0  0  0  0  0  0  0  0
    1.4634    3.2163    0.0000 C   0  0  0  0  0  0  0  0  0  0  0  0
    1.7173    3.9979    0.0000 N   0  0  0  0  0  0  0  0  0  0  0  0
   -0.2906   -3.9979    0.0000 N   0  0  0  0  0  0  0  0  0  0  0  0
    0.4216   -3.5869    0.0000 N   0  3  0  0  0  0  0  0  0  0  0  0
    1.1337   -3.1759    0.0000 N   0  5  0  0  0  0  0  0  0  0  0  0
 22 23  3  0      
  9 22  1  0      
 25 26  2  0      
 24 25  2  0      
 21 24  1  0      
  1  2  2  0      
  2  3  1  0      
  3  4  2  0      
  4  5  1  0      
  5  6  2  0      
  6  1  1  0      
  4  7  1  0      
  7  8  1  0      
  8  9  2  0      
  9  5  1  0      
  6 10  1  0      
  3 11  1  0      
 11 12  1  0      
 12 13  2  0      
 12 14  1  0      
 12 15  2  0      
 14 16  2  0      
 16 17  1  0      
 17 18  2  0      
 18 19  1  0      
 19 20  2  0      
 20 14  1  0      
 18 21  1  0      
M  CHG  2  25   1  26  -1
M  STY  1   1 SUP
M  SLB  1   1   1
M  SAL   1  2  22  23
M  SBL   1  1   2
M  SMT   1 CN
M  SBV   1   2   -0.2543   -0.7821
M  STY  1   2 SUP
M  SLB  1   2   2
M  SAL   2  3  24  25  26
M  SBL   2  1   5
M  SMT   2 N3
M  SBV   2   5   -0.7122    0.4114
M  END
